# Supplementary material for: Synergistic suppression of autoimmune arthritis through concurrent treatment with tolerogenic DC and MSC
Source: PubMed Central journal article supplement (PMC5322386; doi:10.1038/srep43188), 2017-02-23

**Synergistic suppression of autoimmune arthritis through concurrent treatment  
with tolerogenic DC and MSC**

Rong Li<sup>1,2</sup>, Yujuan Zhang<sup>1,2</sup>, Xiufen Zheng<sup>3</sup>, Shanshan Peng<sup>1,2</sup>, Keng Yuan<sup>1,2</sup>, Xusheng Zhang<sup>3</sup> and

Weiping Min<sup>1,2,3\*</sup>

**Supplementary Information:** Whole length gel image for Figure 1B

**Supplementary Figure S1**

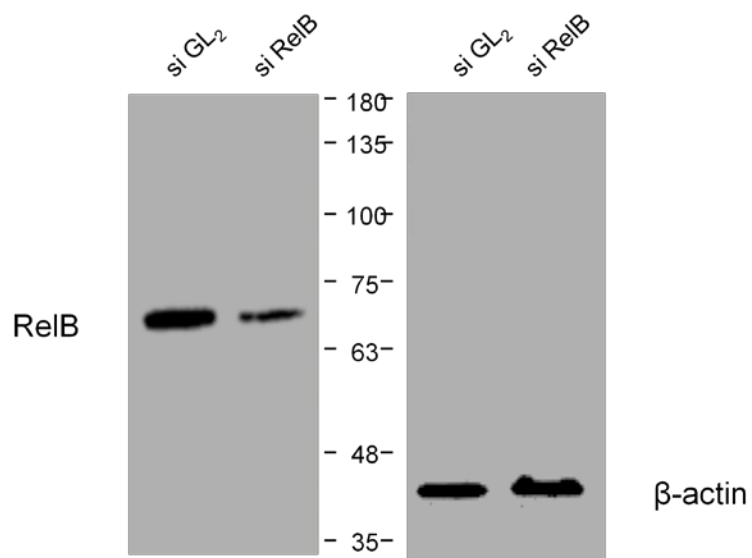

Supplement: srep43188-s1.pdf [file srep43188-s1.pdf]
